# Supplementary material for: Rapid enrichment of phosphopeptides by SiO2–TiO2 composite fibers
Source: Royal Society of Chemistry journal article supplement (doi:10.1039/c3an01091k), 2013-01-01
Supplement: c3an01091k.pdf [file c3an01091k.pdf]

1  
2  
3  
4  
5  
6  
7  
8  
9  
10  
11  
12  
13  
14  
15  
16  
17  
18  
19  
20  
21  
22  
23  
24  
25  
26  
27

## Supporting Information

### Rapid enrichment of phosphopeptides by SiO<sub>2</sub>/TiO<sub>2</sub> composite fibers

Xiao-Mei He, Gang-Tian Zhu, Xiao-Shui Li, Bi-Feng Yuan, Zhi-Guo  
Shi, and Yu-Qi Feng\*

Key Laboratory of Analytical Chemistry for Biology and Medicine  
(Ministry of Education), Department of Chemistry, Wuhan University,  
Wuhan 430072, P.R. China.

\*Corresponding author: Yu-Qi Feng, Department of Chemistry, Wuhan  
University, Wuhan 430072, P.R. China. Tel: +86-27-68755595; Fax:  
+86-27-68755595; E-mail: yqfeng@whu.edu.cn

28 **Table S1.** Detailed information of the observed phosphopeptides obtained from  
29 tryptic digests of  $\beta$ -casein.

| No.       | [M+H] <sup>+</sup> | Phosphorylation site | Sequence                                           |
|-----------|--------------------|----------------------|----------------------------------------------------|
| $\beta$ 1 | 2061.8             | 1                    | FQ <u>S</u> EEQQQTEDELQDK                          |
| $\beta$ 2 | 2556.7             | 1                    | FQ <u>S</u> EEQQQTEDELQDKIHPF                      |
| $\beta$ 3 | 2966.2             | 4                    | ELEELNVPGEIVES <u>L</u> <u>S</u> <u>S</u> SEESITR  |
| $\beta$ 4 | 3122.3             | 4                    | RELEELNVPGEIVES <u>L</u> <u>S</u> <u>S</u> SEESITR |

30

31

32

33

34

35

36

37

38

39

40

41

42

43

44

45

46

47 **Table S2.** Detailed information of the observed phosphopeptides obtained from  
48 human serum.

| No. | [M+H] <sup>+</sup> | Phosphorylation site | Sequence                  |
|-----|--------------------|----------------------|---------------------------|
| F1  | 1389.3             | 1                    | D <u>S</u> GEGDFLAEGGGV   |
| F2  | 1460.3             | 1                    | AD <u>S</u> GEGDFLAEGGGV  |
| F3  | 1545.5             | 1                    | D <u>S</u> GEGDFLAEGGGVR  |
| F4  | 1616.5             | 1                    | AD <u>S</u> GEGDFLAEGGGVR |

49

50

51

52

53

54

55

56

57

58

59

60

61

62

63 **Table S3.** Detailed information of the observed phosphopeptides obtained from  
64 tryptic digests of non-fat milk.

| No.         | [M+H] <sup>+</sup> | Phosphorylation site | Sequence                                                     |
|-------------|--------------------|----------------------|--------------------------------------------------------------|
| $\alpha$ 1  | 1466.6             | 1                    | TVDMES <u>T</u> EVFTK                                        |
| $\alpha$ 2  | 1539.7             | 2                    | EQL <u>S</u> T <u>S</u> EENSKK                               |
| $\alpha$ 3  | 1660.8             | 1                    | VPQLEIVPNS <u>A</u> EER                                      |
| $\alpha$ 4  | 1832.9             | 1                    | YLGEYLIVPNS <u>A</u> EER                                     |
| $\alpha$ 5  | 1847.7             | 1                    | DIGSE <u>S</u> TEDQAMEDIK                                    |
| $\alpha$ 6  | 1927.7             | 2                    | DIG <u>S</u> E <u>S</u> TEDQAMEDIK                           |
| $\alpha$ 7  | 1952.0             | 1                    | YKVPQLEIVPNS <u>A</u> EER                                    |
| $\alpha$ 8  | 2619.0             | 4                    | NTMEHV <u>S</u> <u>S</u> <u>S</u> EE <u>S</u> IISQETYK       |
| $\alpha$ 9  | 2703.5             | 1                    | LRLKKYKVPQLEIVPNS <u>A</u> EERL                              |
| $\alpha$ 10 | 2720.9             | 5                    | QMEAE <u>S</u> IS <u>S</u> SEEIVPNS <u>V</u> EQK             |
| $\alpha$ 11 | 2747.1             | 4                    | NTMEHV <u>S</u> <u>S</u> <u>S</u> EE <u>S</u> IISQETYKQ      |
| $\alpha$ 12 | 3008.0             | 4                    | NANEE <u>E</u> YSIG <u>S</u> <u>S</u> SEE <u>S</u> AEVATEEVK |
| $\beta$ 1   | 2061.8             | 1                    | FQ <u>S</u> EEQQQTEDELQDK                                    |
| $\beta$ 2   | 2556.7             | 1                    | FQ <u>S</u> EEQQQTEDELQDKIHPF                                |
| $\beta$ 3   | 2966.2             | 4                    | ELEELNVPGEIVES <u>L</u> <u>S</u> <u>S</u> SEESITR            |
| $\beta$ 4   | 3122.3             | 4                    | RELEELNVPGEIVES <u>L</u> <u>S</u> <u>S</u> SEESITR           |

65  
66  
67  
68  
69  
70  
71  
72  
73  
74  
75  
76  
77  
78  
79  
80  
81  
82  
83  
84  
85  
86

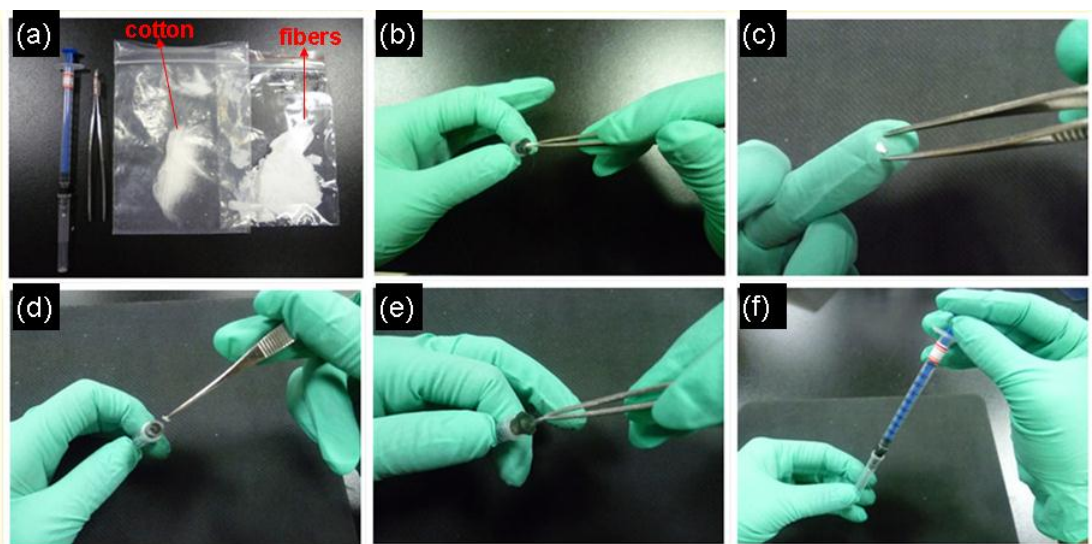

87

88 **Fig S1.** Preparation of the lab-in-syringe system with SiO<sub>2</sub>/TiO<sub>2</sub> composite fibers.
